# Supplementary material for: Evaluating the diurnal cycle of South Atlantic stratocumulus clouds as observed by MSG SEVIRI
Source: Copernicus journal article supplement (doi:10.5194/acp-18-13283-2018), 2018-09-14
Supplement: Supplementary file 1 [file acp-18-13283-2018-supplement.zip]

Archive with 13 entries (11 files):
- acp-18-13283-2018-supplement-title-page.pdf
- supplemental/
- supplemental/acp-2018-445_Supplemental.pdf
- supplemental/Figures/
- supplemental/Figures/Figure-S6.eps
- supplemental/Figures/Figure-S7.eps
- supplemental/Figures/Figure-S4.eps
- supplemental/Figures/Figure-S8.eps
- supplemental/Figures/Figure-S2.eps
- supplemental/Figures/Figure-S5.eps
- supplemental/Figures/Figure-S1.eps
- supplemental/Figures/Figure-S3.eps
- supplemental/.DS_Store
