# Supplementary material for: Evaluating the diurnal cycle of South Atlantic stratocumulus clouds as observed by MSG SEVIRI
Source: Copernicus journal article supplement (doi:10.5194/acp-18-13283-2018), 2018-09-14
Supplement: Supplementary file 1 [file acp-18-13283-2018-supplement.zip › acp-18-13283-2018-supplement-title-page.pdf]

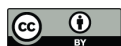

## *Supplement of*

# **Evaluating the diurnal cycle of South Atlantic stratocumulus clouds as observed by MSG SEVIRI**

**Chellappan Seethala et al.**

*Correspondence to:* Chellappan Seethala (seethala.chellappan@fmi.fi)

- acp-18-13283-2018-supplement-title-page.pdf
- supplemental
  - .DS\_Store
  - Figures
    - \* Figure-S1.eps
    - \* Figure-S2.eps
    - \* Figure-S3.eps
    - \* Figure-S4.eps
    - \* Figure-S5.eps
    - \* Figure-S6.eps
    - \* Figure-S7.eps
    - \* Figure-S8.eps
  - acp-2018-445\_Supplemental.pdf

The copyright of individual parts of the supplement might differ from the CC BY 4.0 License.
