# Supplementary material for: Evaluating the diurnal cycle of South Atlantic stratocumulus clouds as observed by MSG SEVIRI
Source: Copernicus journal article supplement (doi:10.5194/acp-18-13283-2018), 2018-09-14
Supplement: Supplementary file 1 [file acp-18-13283-2018-supplement.zip › supplemental/acp-2018-445_Supplemental.pdf]

## Supplemental Materials

**Table S1.** Two-year mean and seasonal statistics of collocated SEVIRI and MODIS retrievals in rain-free, ice-free, smoke-free (AI < 0.1),  $\tau > 3$ , and overcast (LCF  $\geq 95\%$ ) grid cells over the marine stratocumulus region. The  $\tau$  means and  $r_e$  means (in micron) are listed. The values in brackets are statistics without filtering for LCF  $\geq 95\%$  and  $\tau > 3$ , i.e., for the all-sky case.

|                                  | JJA         | SON         | DJF         | MAM         | Two-year    |
|----------------------------------|-------------|-------------|-------------|-------------|-------------|
| Stratocumulus (SEVIRI vs. MODIS) |             |             |             |             |             |
| SEVIRI $\tau$                    | 10.2 (5.9)  | 10.3 (7.1)  | 9.9 (5.2)   | 9.9 (4.8)   | 10.2 (6.0)  |
| MODIS 1.6 $\tau$                 | 11.3 (7.3)  | 11.3 (8.3)  | 10.8 (6.3)  | 10.8 (5.9)  | 11.1 (7.2)  |
| SEVIRI $r_e$                     | 8.8 (10.2)  | 10.2 (11.1) | 11.6 (11.4) | 10.5 (10.7) | 10.1 (10.9) |
| MODIS 1.6 $r_e$                  | 10.3 (12.6) | 11.5 (12.9) | 12.2 (13.4) | 11.4 (13.2) | 11.3 (13.0) |
| MODIS 2.1 $r_e$                  | 11.1 (13.8) | 11.9 (13.3) | 12.3 (13.4) | 11.6 (13.6) | 11.7 (13.5) |
| MODIS 3.7 $r_e$                  | 11.5 (12.6) | 11.7 (12.5) | 11.6 (11.9) | 11.2 (11.8) | 11.6 (12.2) |
| Correl. $\tau$ 1.6               | 0.96 (0.93) | 0.97 (0.96) | 0.96 (0.95) | 0.96 (0.94) | 0.96 (0.95) |
| Correl. $r_e$ 1.6                | 0.93 (0.73) | 0.90 (0.76) | 0.92 (0.60) | 0.92 (0.62) | 0.92 (0.70) |
| Correl. $r_e$ 2.1                | 0.90 (0.77) | 0.90 (0.77) | 0.91 (0.62) | 0.92 (0.67) | 0.89 (0.72) |
| Correl. $r_e$ 3.7                | 0.86 (0.81) | 0.78 (0.76) | 0.87 (0.64) | 0.87 (0.64) | 0.80 (0.74) |

**Discussion:** Frequency histograms of SEVIRI – MODIS LWP,  $\tau$ , and  $r_e$  difference, as well as, the differences relative to MODIS LWP,  $\tau$ , and  $r_e$  for the overcast condition aggregated during JAS 2011 and JAS 2012 are shown in Fig. S1. The histogram of SEVIRI – MODIS  $\tau$  differences revealed that the peak of the distribution is off zero with ~35 % of the data falling into the -1 bin. Only ~17 % of data showed mean zero difference, while ~23 % of data showed a difference of -2. The SEVIRI  $\tau$  relative to MODIS  $\tau$  was within 10 % for 36 % of the data, within 20 % for 80 % of the data, and within 30 % for 95 % of the retrievals. Overall, SEVIRI  $\tau$  appeared to be low by ~1 compared to MODIS  $\tau$ .

SEVIRI  $r_e$  retrieved in the 1.6- $\mu\text{m}$  channel was compared with MODIS  $r_e$  values retrieved in three water absorbing channels at 1.6-, 2.1-, and 3.7- $\mu\text{m}$ . Compared to the 1.6- $\mu\text{m}$  MODIS  $r_e$ , ~70 % of SEVIRI  $r_e$  have a mean difference of -1.5  $\mu\text{m}$ . Compared to the 2.1- and 3.7- $\mu\text{m}$  MODIS  $r_e$ , the difference histograms indicate larger

differences:  $\sim 55\%$  and  $\sim 50\%$  of SEVIRI  $r_e$  have a difference of  $-2.5\ \mu\text{m}$ , respectively. Although SEVIRI  $r_e$  are biased low compared to all three MODIS  $r_e$ , the  $\sim 1\ \mu\text{m}$  additional low bias relative to the 2.1- and 3.7- $\mu\text{m}$   $r_e$  likely indicates much smaller smoke-induced retrieval artifacts in these two channels. In general, the  $r_e$  retrievals from SEVIRI tend to be lower than corresponding retrievals from the three MODIS channels, with SEVIRI having about 1.5  $\mu\text{m}$  to 2.5  $\mu\text{m}$  lower  $r_e$  values.

The SEVIRI minus MODIS LWP distributions peak at about  $-10\ \text{g m}^{-2}$  irrespective of the MODIS channel used for the retrieval. The differences between MODIS 1.6- $\mu\text{m}$  and SEVIRI retrievals are within 10 % for about 30 % of SEVIRI pixels, within 20 % for about 60 % of the SEVIRI pixels, and within 30 % for about 80 % of the SEVIRI pixels. However, differences between SEVIRI and MODIS 2.1- $\mu\text{m}$  and 3.7- $\mu\text{m}$  channel retrievals are larger, with relative differences being smaller than 10 % for about 22 % of the SEVIRI pixels against MODIS 2.1- $\mu\text{m}$  and for about 16 % of the SEVIRI pixels against MODIS 3.7- $\mu\text{m}$  values.

The frequency histograms of SEVIRI – MODIS LWP,  $\tau$ , and  $r_e$  differences, as well as the difference with respect to different MODIS channels for the 2-year aggregate are shown in Fig. S3 (all-sky case) and Fig. S4 (overcast case). The peak of the LWP absolute/relative difference distribution is centred on zero, although the distribution is negatively skewed. Interestingly, in the all-sky case  $\sim 40\%$  of the data have shown negligible difference (zero LWP bias bin), whereas, only about 30 % of the data have shown a negligible difference in the overcast case. About 20–30 % of the data have fallen into the LWP difference bin of  $-10\ \text{g m}^{-2}$  in either cases. In the overcast case,  $\sim 40\%$  of the data have shown a relative LWP difference  $< 10\%$  and  $\sim 90\%$  of the data have shown a relative LWP difference  $< 30\%$ ; however, for the all-sky case, only about 25 % and 60 % of the data have shown relative LWP differences  $< 10\%$  and  $< 30\%$ . Respectively, about 48 %, 84 %, 95 % of the observations show relative  $\tau$  differences within 10 %, 20 %, and 30 % in the overcast case. Similarly, about 90 % of the observations show relative  $r_e$  differences within 30 % in the overcast case. Histograms of both  $\tau$  and  $r_e$  differences reveal that the distribution is off centered. Histograms of  $\tau$  differences reveal a narrow distribution which peaks at -1 especially in the overcast case; however in the all-sky case a broader peak is noticed between -1 and 0. Histograms of  $r_e$  differences reveal wider distributions (especially when compared against the 2.1- and 3.7- $\mu\text{m}$  channels), which peak at -1  $\mu\text{m}$  in the overcast case; however, in the all-sky case a broader peak is noticed between -2  $\mu\text{m}$  and -1  $\mu\text{m}$ .

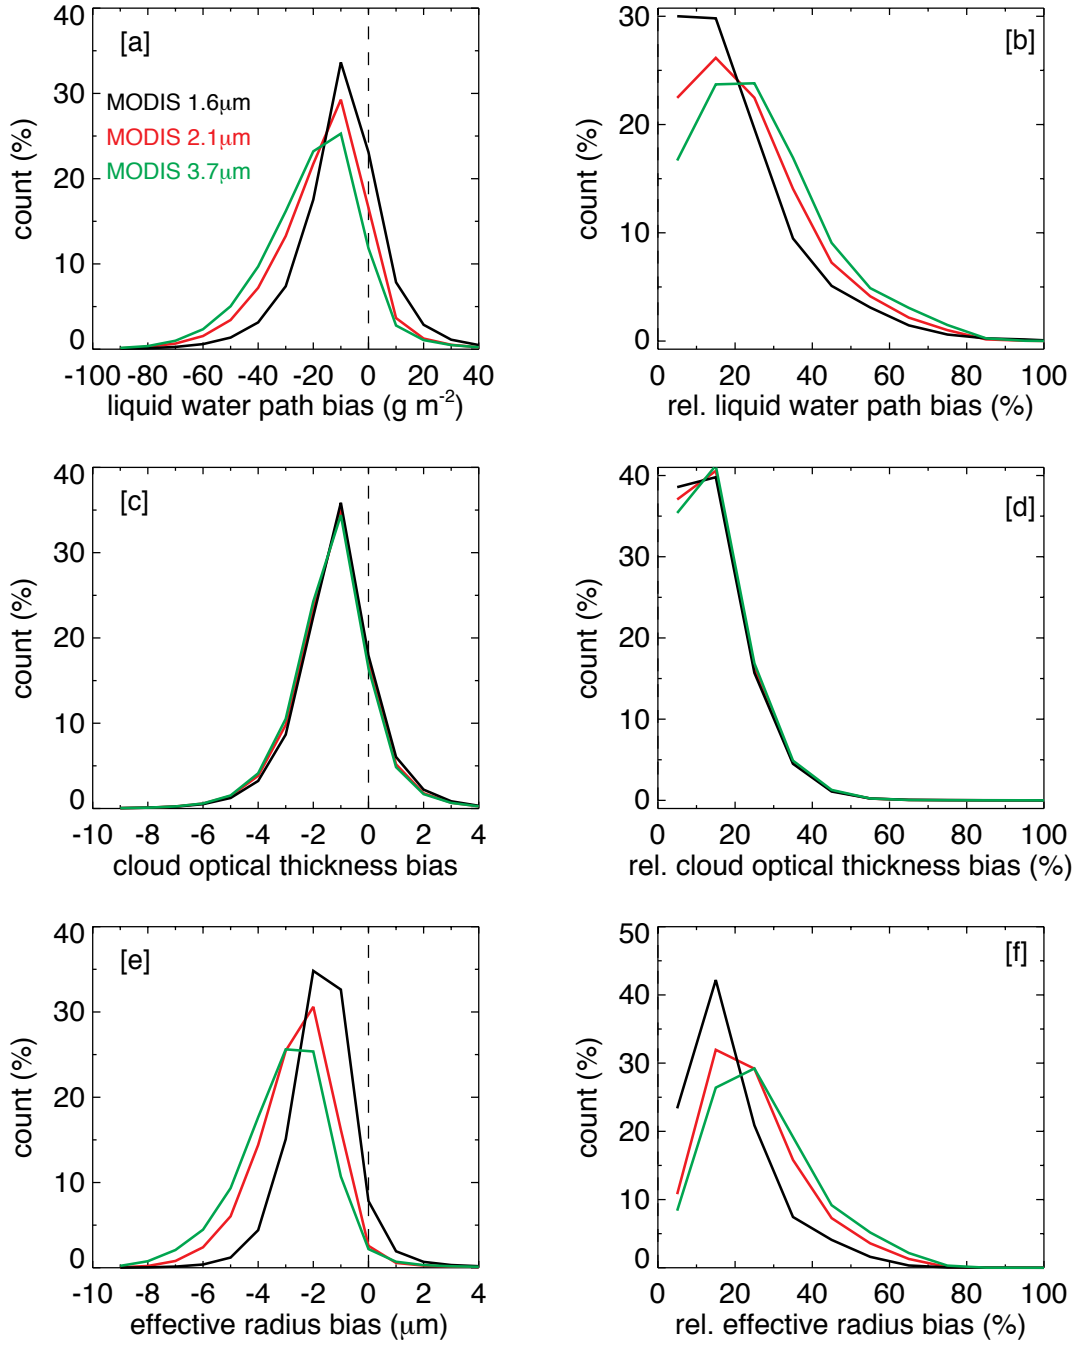

50

**Figure S1.** Histogram of SEVIRI – MODIS liquid water path differences (a), cloud optical thickness differences (c), and droplet effective radius differences (e), as well as, histogram of SEVIRI – MODIS LWP,  $\tau$ ,  $r_e$  differences relative to MODIS LWP (b),  $\tau$  (d), and  $r_e$  (f) for JAS 2011 and JAS 2012 for overcast ( $\text{LCF} \geq 95\%$  and  $\tau > 3$ ) rain- and ice-free conditions.

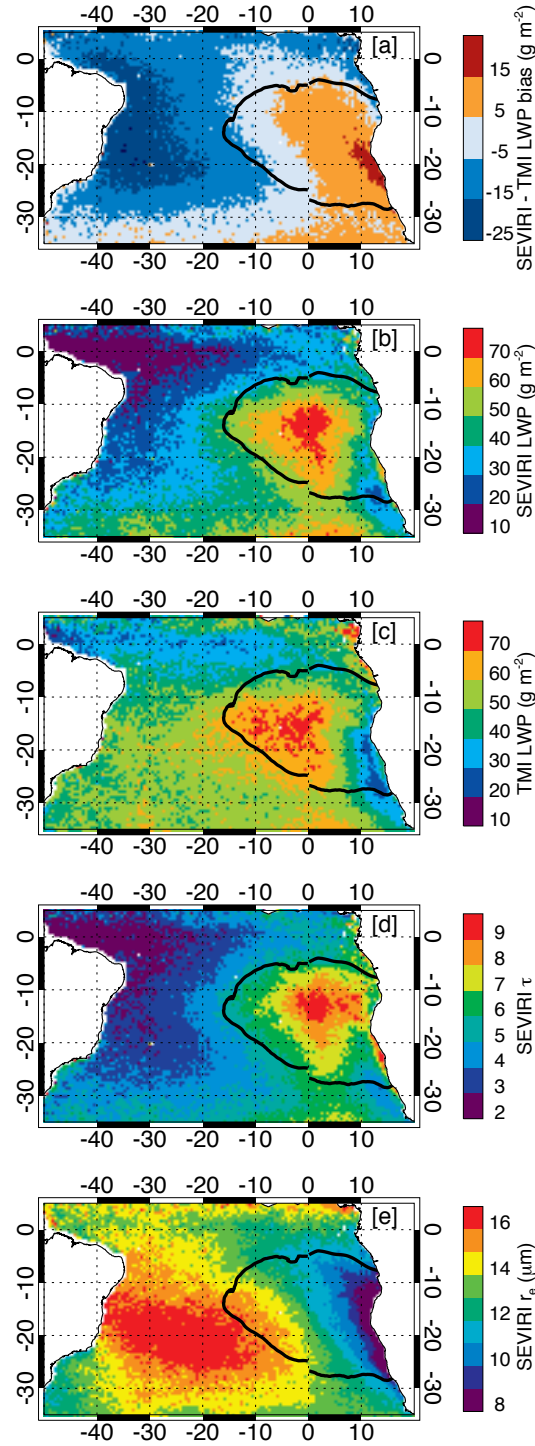

**Figure S2.** Two-year mean map of (a) SEVIRI minus TMI LWP difference, (b) SEVIRI LWP, (c) TMI LWP, (d) SEVIRI  $\tau$ , (e) SEVIRI 1.6- $\mu\text{m}$   $r_e$ , for the all-sky case. The solid black contour denotes the identified Sc region. Rain-, ice-, and aerosol-free conditions were applied.

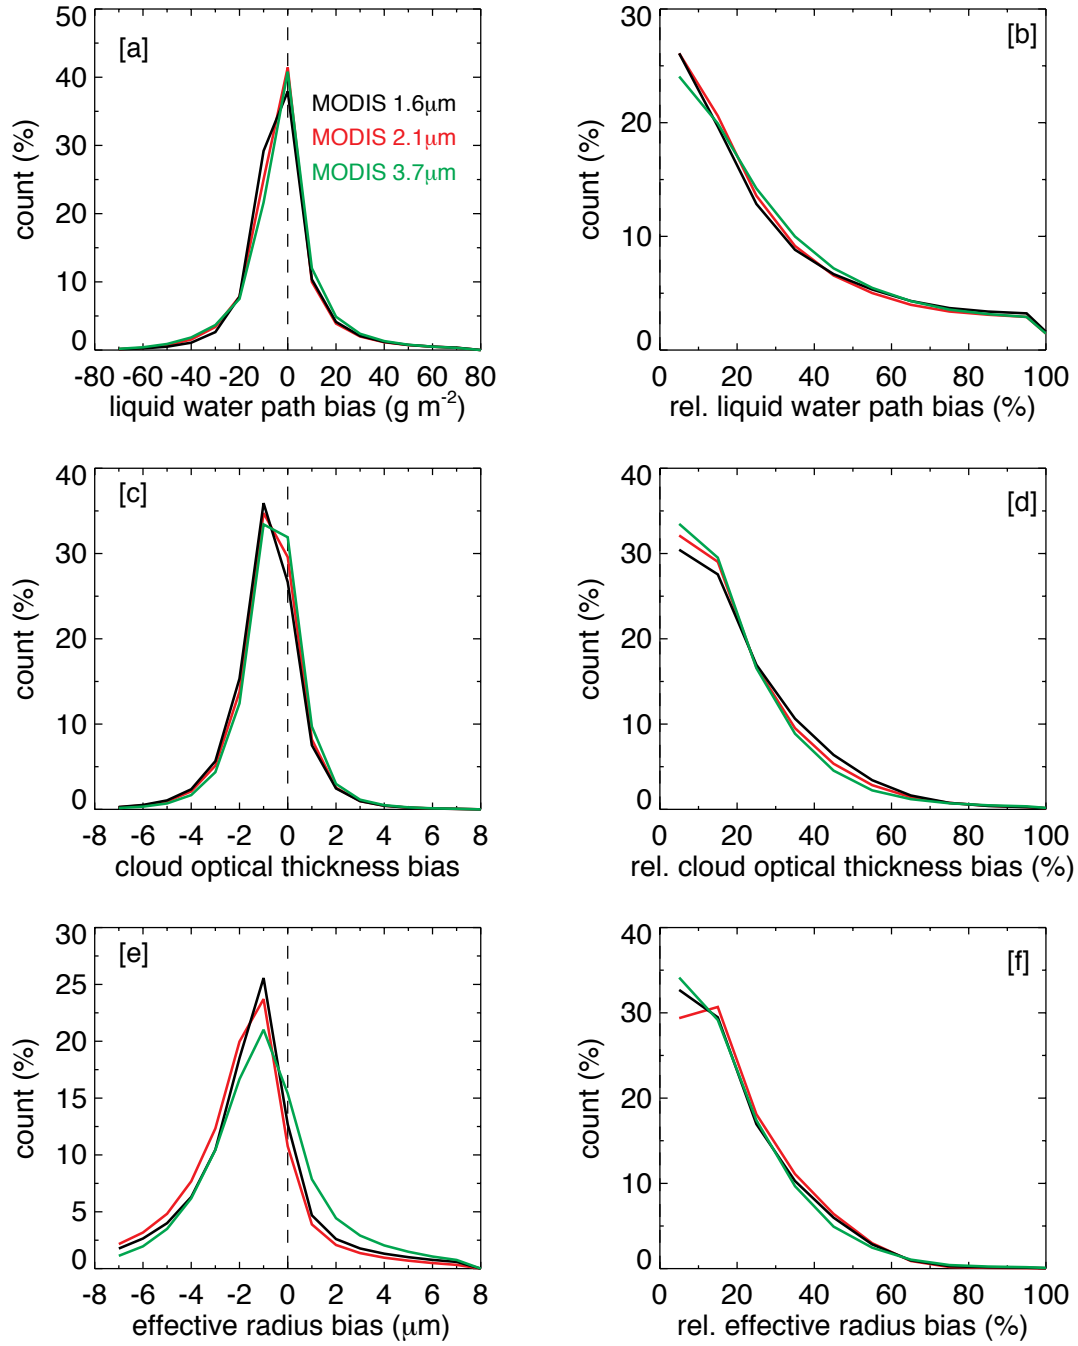

65

**Figure S3.** Histogram of SEVIRI – MODIS liquid water path differences (a), cloud optical thickness differences (c), and droplet effective radius differences (e), as well as, histogram of SEVIRI – MODIS LWP,  $\tau$ ,  $r_e$  differences relative to MODIS LWP (b),  $\tau$  (d), and  $r_e$  (f) for December 2010 to November 2012 for the all-sky case with rain- and ice-free conditions.

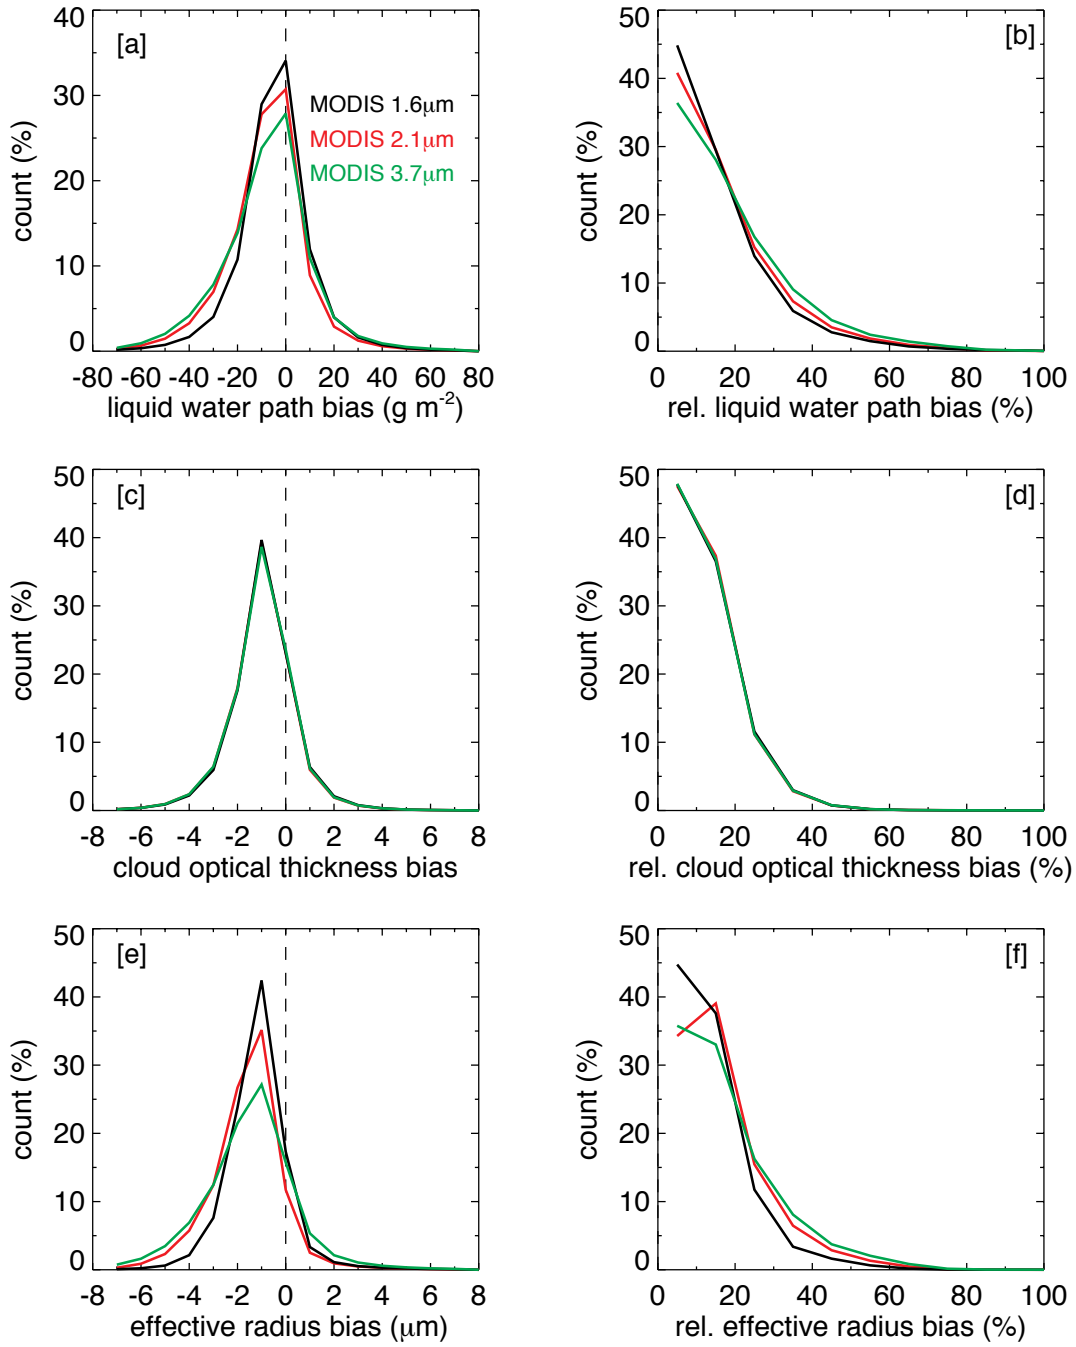

70

75

**Figure S4.** Histogram of SEVIRI – MODIS liquid water path differences (a), cloud optical thickness differences (c), and droplet effective radius differences (e), as well as, histogram of SEVIRI – MODIS LWP,  $\tau$ ,  $r_e$  differences relative to MODIS LWP (b),  $\tau$  (d), and  $r_e$  (f) for December 2010 to November 2012 for the overcast case ( $\text{LCF} \geq 95\%$  and  $\tau > 3$ ) in rain- and ice-free conditions.

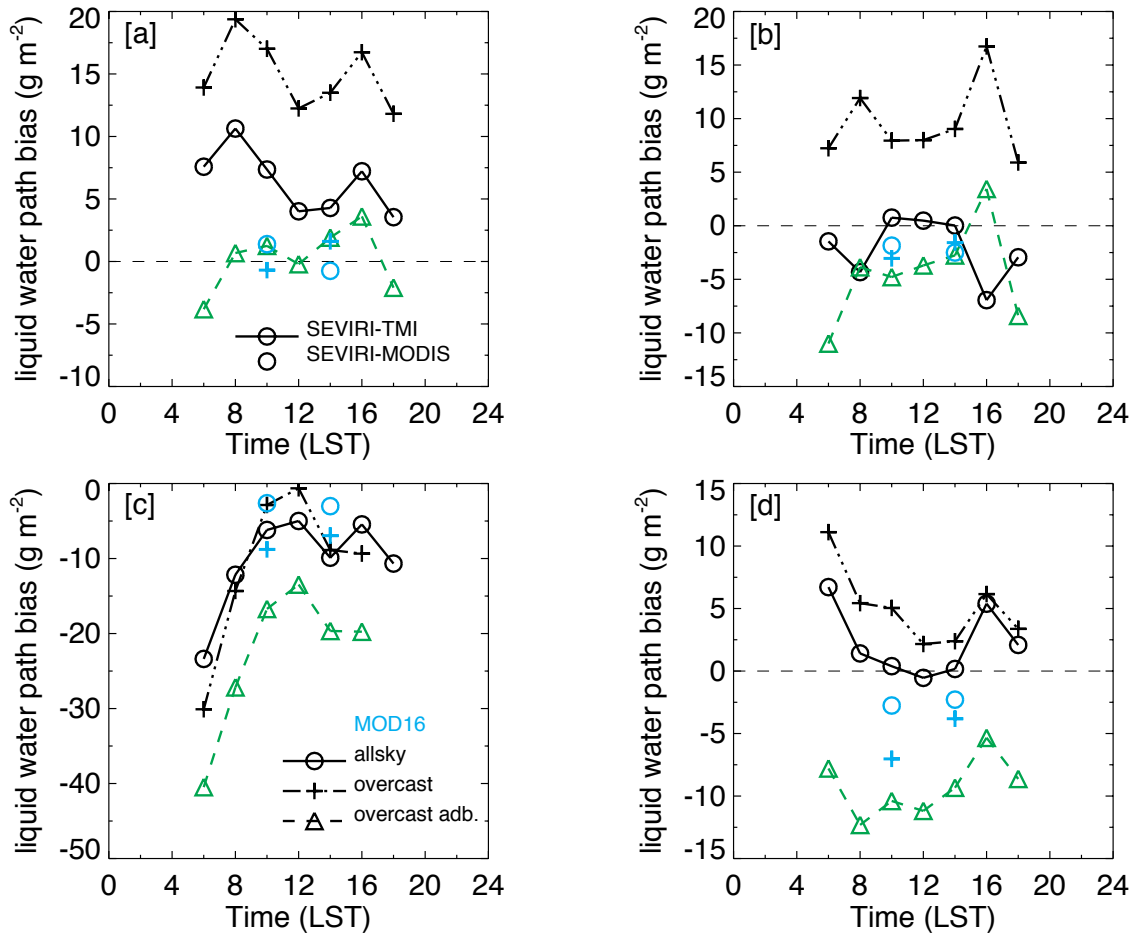

**Figure S5.** Seasonal mean diurnal cycle of SEVIRI LWP bias compared to TMI as well as Terra and Aqua MODIS, over the Sc region, both for all-sky and overcast-cases ( $\text{LCF} \geq 95\%$  and  $\tau > 3$ ): (a) DJF, (b) MAM, (c) JJA, and (d) SON of the study period. Rain-, ice-, and smoke-free conditions were applied.

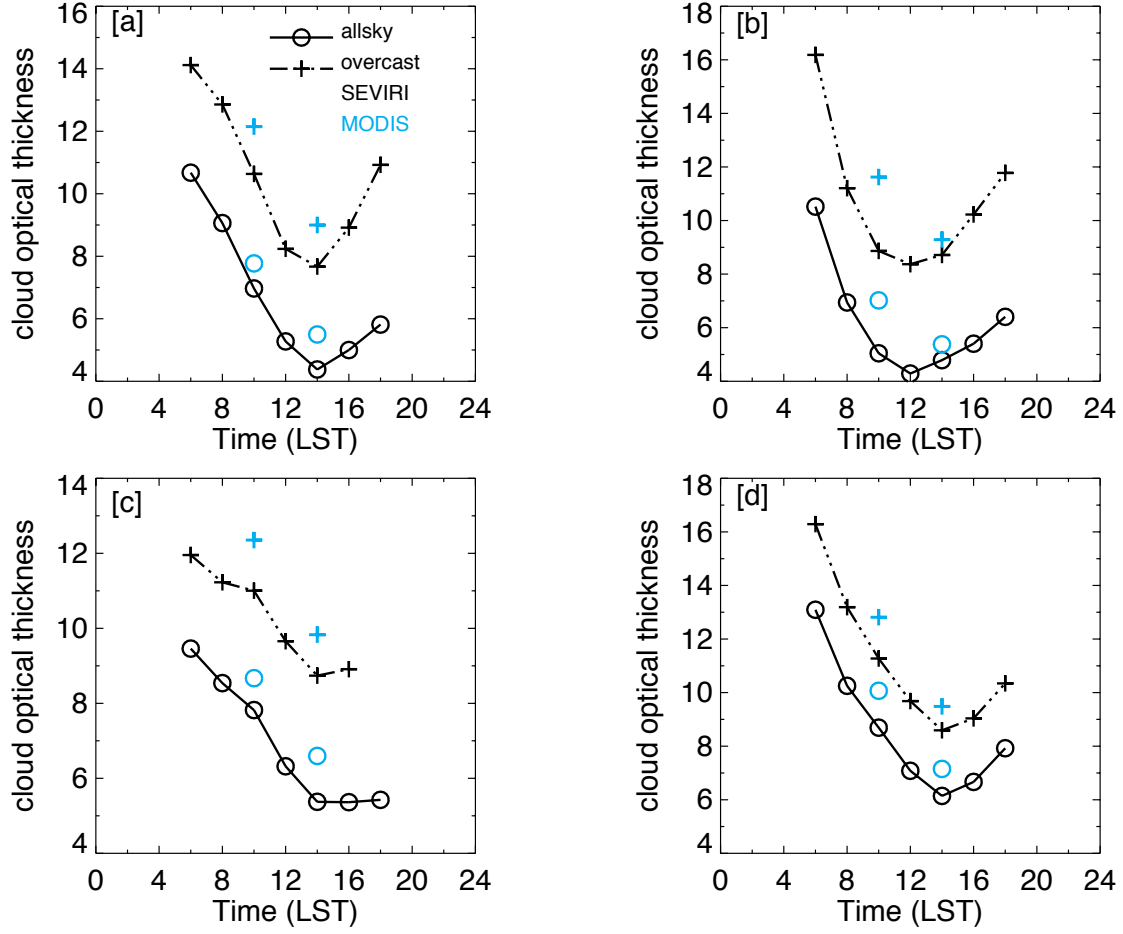

95

100

**Figure S6.** Seasonal mean diurnal cycle of SEVIRI and Terra and Aqua MODIS cloud optical thicknesses over the Sc region, both for all-sky and overcast-cases ( $\text{LCF} \geq 95\%$  and  $\tau > 3$ ): (a) DJF, (b) MAM, (c) JJA, and (d) SON of the study period.

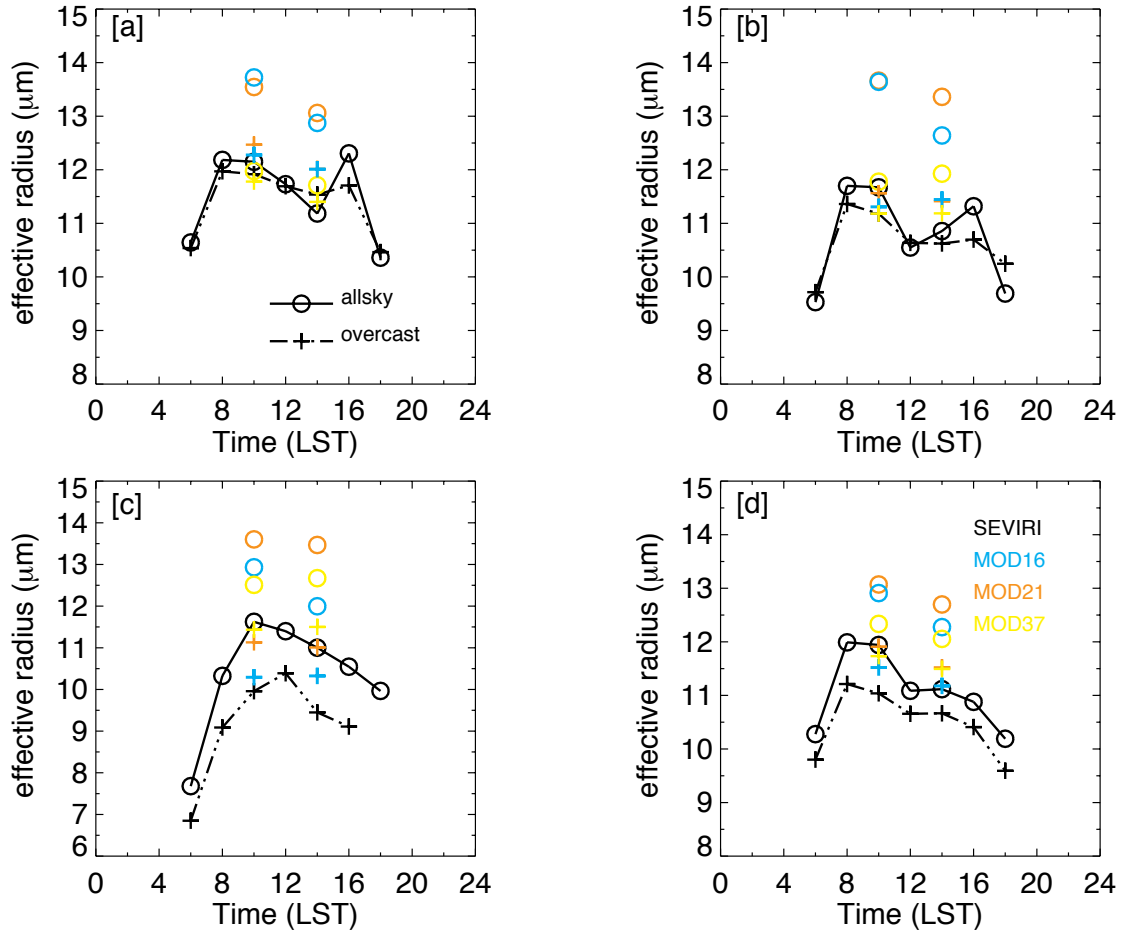

**Figure S7.** Seasonal mean diurnal cycle of SEVIRI and Terra and Aqua MODIS cloud droplet effective radius over the Sc region, both for all-sky and overcast-cases (LCF  $\geq 95\%$  and  $\tau > 3$ ): (a) DJF, (b) MAM, (c) JJA, and (d) SON of the study period.

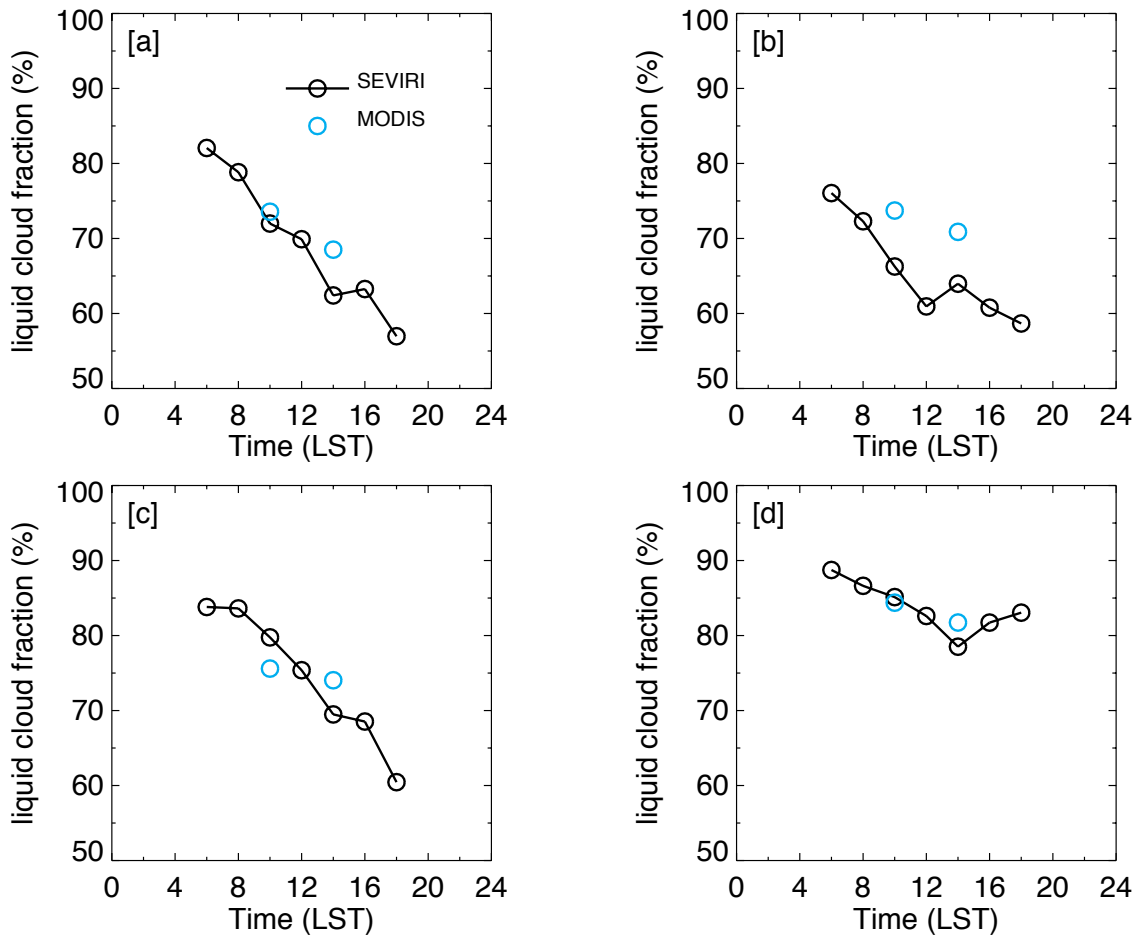

**Figure S8.** Seasonal mean diurnal cycle of SEVIRI and Terra and Aqua MODIS liquid cloud fraction over the Sc region, for all-sky case: (a) DJF, (b) MAM, (c) JJA, and (d) SON of the study period.
